# Supplementary material for: Overexpressed EDIL3 predicts poor prognosis and promotes anchorage-independent tumor growth in human pancreatic cancer
Source: PubMed Central journal article supplement (PMC4826201; doi:10.18632/oncotarget.6772), 2015-12-28
Supplement: oncotarget-07-4226-s001.pdf [file oncotarget-07-4226-s001.pdf]

# Overexpressed EDIL3 predicts poor prognosis and promotes anchorage-independent tumor growth in human pancreatic cancer

## Supplementary Materials

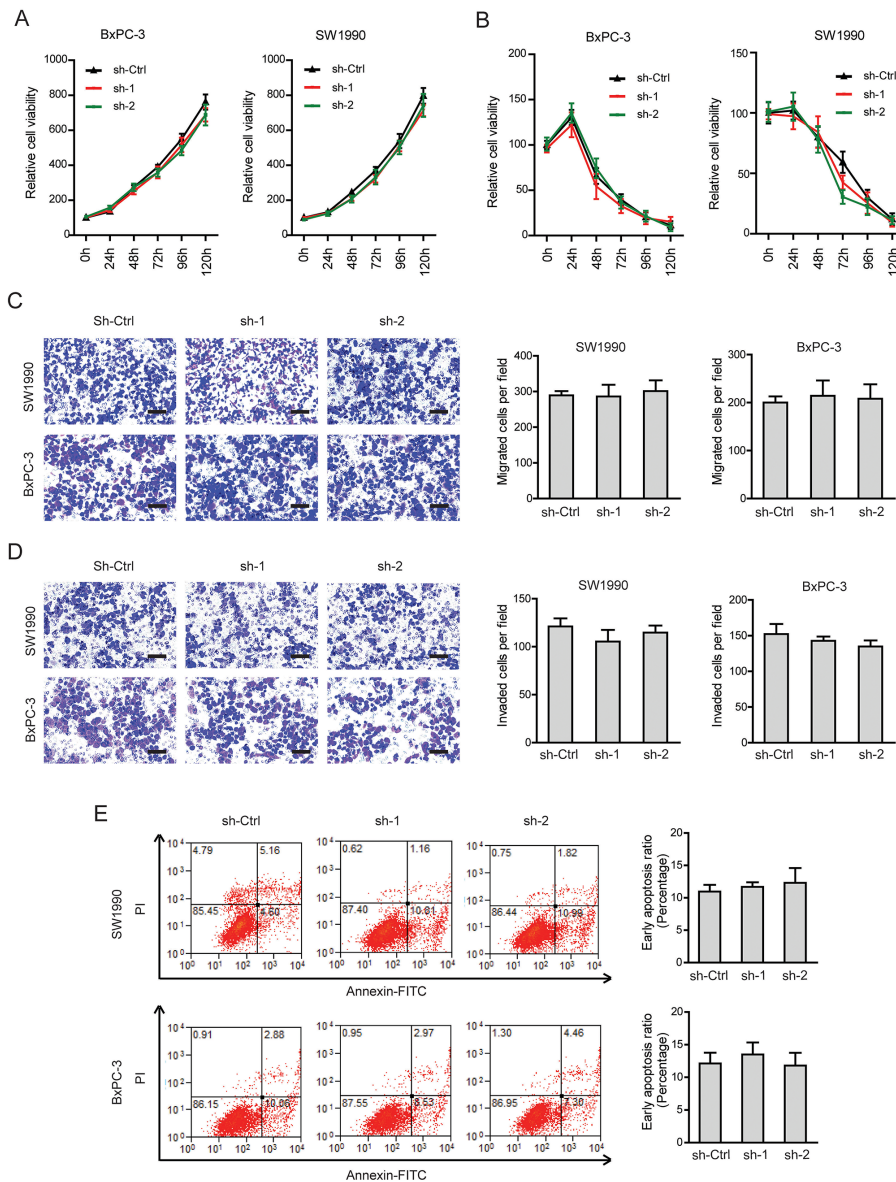

**Supplementary Figure S1: Knockdown of EDIL3 shows no significant influence on cell proliferation, migration, invasion and apoptosis.** Cell viability of BxPC-3 and SW1990 cells in the presence (A) or absence (B) of 10% FBS was measured by CCK-8 assay. Cell migration (C), invasion (D) and starvation-induced apoptosis (E) of PDAC cells were measured after knockdown of EDIL3. Scale bar: 50  $\mu$ m.

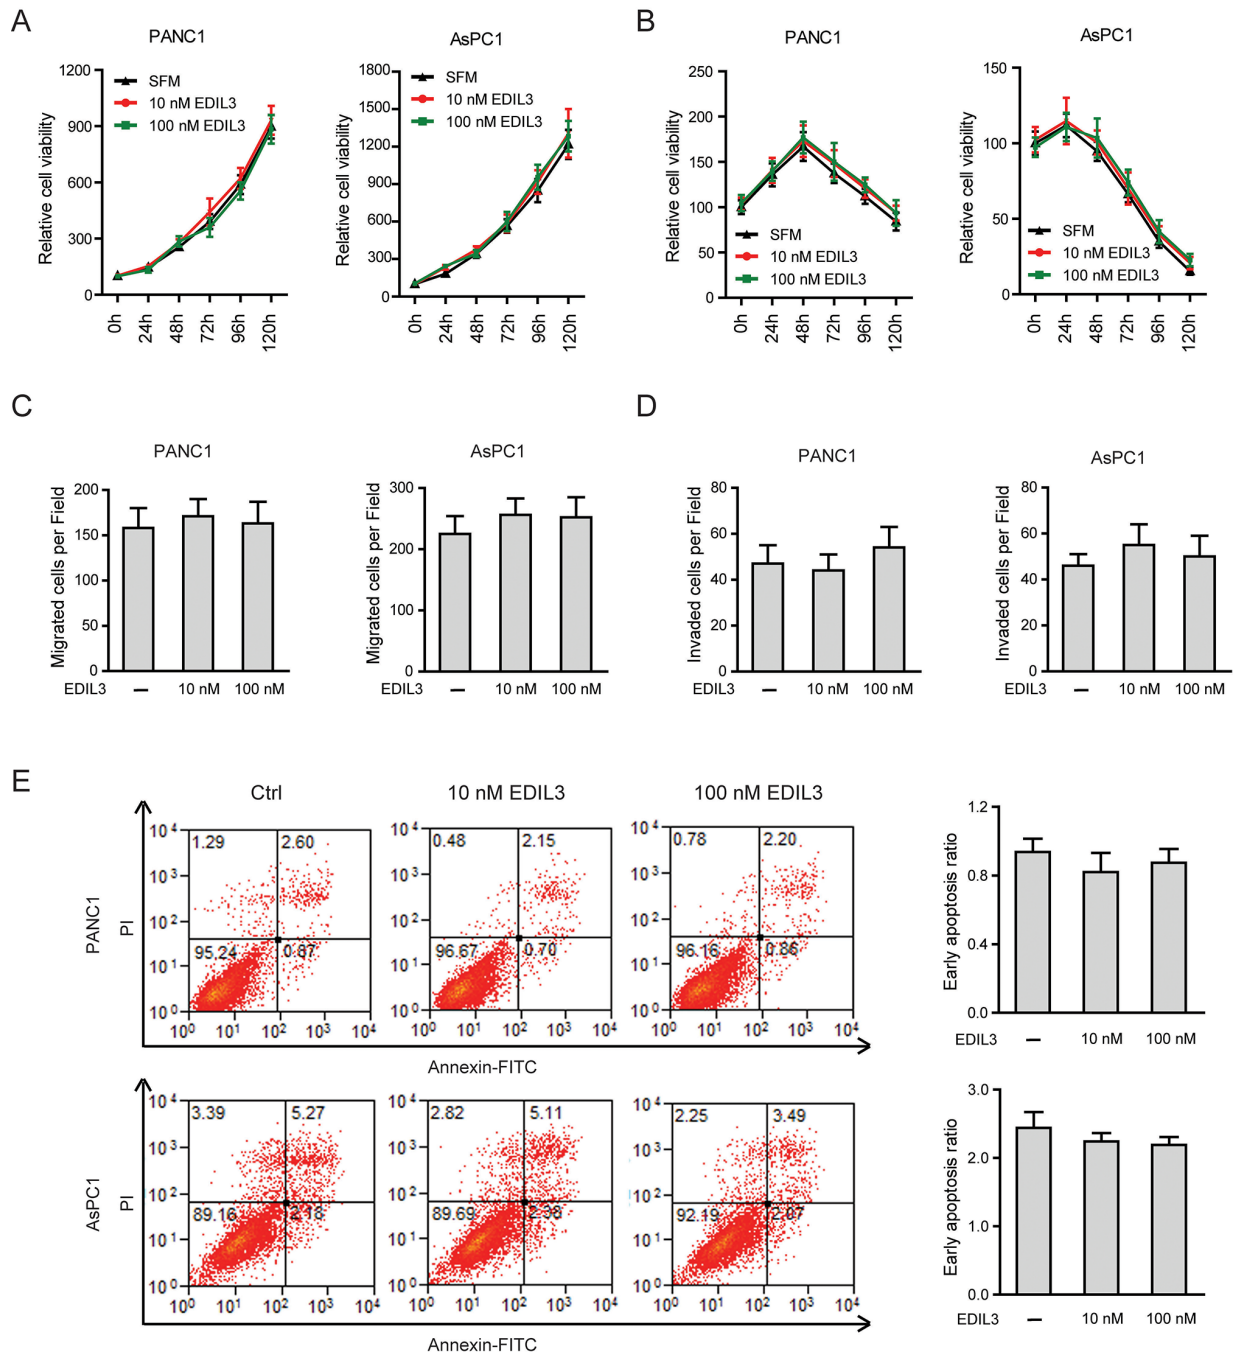

**Supplementary Figure S2: EDIL3 stimulation shows no significant influence on cell proliferation, migration, invasion and apoptosis.** Cell viability of PANC1 and AsPC1 cells in the presence (A) or absence (B) of 10% FBS was measured by CCK-8 assay. Cell migration (C), invasion (D) and starvation-induced apoptosis (E) of PDAC cells were measured after treatment with different concentrations of recombinant EDIL3 protein.
